# Supplementary material
Source: publisher figshare collection journal article supplement (https://acs.figshare.com/ndownloader/files/4499530)
Supplement: Supplementary file 1 [file 4499530]

 
data_compoundI
 
_audit_creation_method            SHELXL-97
_chemical_name_systematic
;
 ?
;
_chemical_name_common             Indiumphosphiteoxalate
_chemical_melting_point           ?
_chemical_formula_moiety          ?
_chemical_formula_sum             'C10 H23 In N3 O13 P S0'
_chemical_formula_weight          539.10
 
loop_
 _atom_type_symbol
 _atom_type_description
 _atom_type_scat_dispersion_real
 _atom_type_scat_dispersion_imag
 _atom_type_scat_source
 'C'  'C'   0.0033   0.0016
 'International Tables Vol C Tables 4.2.6.8 and 6.1.1.4'
 'H'  'H'   0.0000   0.0000
 'International Tables Vol C Tables 4.2.6.8 and 6.1.1.4'
 'N'  'N'   0.0061   0.0033
 'International Tables Vol C Tables 4.2.6.8 and 6.1.1.4'
 'O'  'O'   0.0106   0.0060
 'International Tables Vol C Tables 4.2.6.8 and 6.1.1.4'
 'P'  'P'   0.1023   0.0942
 'International Tables Vol C Tables 4.2.6.8 and 6.1.1.4'
 'S'  'S'   0.1246   0.1234
 'International Tables Vol C Tables 4.2.6.8 and 6.1.1.4'
 'In'  'In'  -0.7276   1.3100
 'International Tables Vol C Tables 4.2.6.8 and 6.1.1.4'
 
_symmetry_cell_setting            Triclinic
_symmetry_space_group_name_H-M    P-1
 
loop_
 _symmetry_equiv_pos_as_xyz
 'x, y, z'
 '-x, -y, -z'
 
_cell_length_a                    9.7495(16)
_cell_length_b                    10.0012(16)
_cell_length_c                    10.3398(17)
_cell_angle_alpha                 93.078(3)
_cell_angle_beta                  104.573(2)
_cell_angle_gamma                 96.886(2)
_cell_volume                      965.0(3)
_cell_formula_units_Z             2
_cell_measurement_temperature     293(2)
_cell_measurement_reflns_used     4471
_cell_measurement_theta_min       2.04
_cell_measurement_theta_max       28.04
 
_exptl_crystal_description        plate-like
_exptl_crystal_colour             colorless
_exptl_crystal_size_max           0.16
_exptl_crystal_size_mid           0.12
_exptl_crystal_size_min           0.12
_exptl_crystal_density_meas       ?
_exptl_crystal_density_diffrn     1.855
_exptl_crystal_density_method     'not measured'
_exptl_crystal_F_000              544
_exptl_absorpt_coefficient_mu     1.378
_exptl_absorpt_correction_type    ‘Multi-scan’
_exptl_absorpt_correction_T_min    0.8096
_exptl_absorpt_correction_T_max    0.8745
_exptl_absorpt_process_details    ‘(SADABS;Sheldrick,1996)’
 
_exptl_special_details
;
 ?
;
 
_diffrn_ambient_temperature       293(2)
_diffrn_radiation_wavelength      0.71073
_diffrn_radiation_type            MoK\a
_diffrn_radiation_source          'fine-focus sealed tube'
_diffrn_radiation_monochromator   graphite
_diffrn_measurement_device_type   ‘BrukerSMARTCCDareadetector’
_diffrn_measurement_method        ‘\fand\wscans’
_diffrn_detector_area_resol_mean  ?
_diffrn_standards_number          ?
_diffrn_standards_interval_count  ?
_diffrn_standards_interval_time   ?
_diffrn_standards_decay_%         ?
_diffrn_reflns_number             11279
_diffrn_reflns_av_R_equivalents   0.0182
_diffrn_reflns_av_sigmaI/netI     0.0237
_diffrn_reflns_limit_h_min        -12
_diffrn_reflns_limit_h_max        12
_diffrn_reflns_limit_k_min        -12
_diffrn_reflns_limit_k_max        13
_diffrn_reflns_limit_l_min        -13
_diffrn_reflns_limit_l_max        13
_diffrn_reflns_theta_min          2.04
_diffrn_reflns_theta_max          28.04
_reflns_number_total              4471
_reflns_number_gt                 4180
_reflns_threshold_expression      >2sigma(I)
 
_computing_data_collection        ‘SMART(Bruker,2000)’
_computing_cell_refinement        ‘SMART’
_computing_data_reduction         ‘SAINT(Bruker,2000)’
_computing_structure_solution     ‘SIR92(Altomareetal.,1993)’
_computing_structure_refinement   'SHELXL-97(Sheldrick,1997)'
_computing_molecular_graphics     ‘Ortep-3forWindows(Farrugia,1997)andCAMERON

_computing_publication_material   ‘PLATON(Spek,1990)’

 
_refine_special_details
;
 Refinement of F^2^ against ALL reflections.  The weighted R-factor wR and
 goodness of fit S are based on F^2^, conventional R-factors R are based
 on F, with F set to zero for negative F^2^. The threshold expression of
 F^2^ > 2sigma(F^2^) is used only for calculating R-factors(gt) etc. and is
 not relevant to the choice of reflections for refinement.  R-factors based
 on F^2^ are statistically about twice as large as those based on F, and R-
 factors based on ALL data will be even larger.
;
 
_refine_ls_structure_factor_coef  Fsqd
_refine_ls_matrix_type            full
_refine_ls_weighting_scheme       calc
_refine_ls_weighting_details
 'calc w=1/[\s^2^(Fo^2^)+(0.0447P)^2^+1.8513P] where P=(Fo^2^+2Fc^2^)/3'
_atom_sites_solution_primary      direct
_atom_sites_solution_secondary    difmap
_atom_sites_solution_hydrogens    geom
_refine_ls_hydrogen_treatment     mixed
_refine_ls_extinction_method      none
_refine_ls_extinction_coef        ?
_refine_ls_number_reflns          4471
_refine_ls_number_parameters      269
_refine_ls_number_restraints      4
_refine_ls_R_factor_all           0.0342
_refine_ls_R_factor_gt            0.0315
_refine_ls_wR_factor_ref          0.0908
_refine_ls_wR_factor_gt           0.0890
_refine_ls_goodness_of_fit_ref    1.108
_refine_ls_restrained_S_all       1.108
_refine_ls_shift/su_max           0.004
_refine_ls_shift/su_mean          0.000
 
loop_
 _atom_site_label
 _atom_site_type_symbol
 _atom_site_fract_x
 _atom_site_fract_y
 _atom_site_fract_z
 _atom_site_U_iso_or_equiv
 _atom_site_adp_type
 _atom_site_occupancy
 _atom_site_symmetry_multiplicity
 _atom_site_calc_flag
 _atom_site_refinement_flags
 _atom_site_disorder_assembly
 _atom_site_disorder_group
In1 In 0.14889(2) 0.12991(2) 0.69877(2) 0.02068(8) Uani 1 1 d . . .
P1 P 0.11493(9) -0.18655(8) 0.56040(8) 0.02313(17) Uani 1 1 d . . .
H1 H 0.0936 -0.2067 0.6456 0.028 Uiso 1 1 calc R . .
O1 O 0.0235(3) 0.2280(2) 0.5484(3) 0.0354(6) Uani 1 1 d . . .
O2 O 0.1665(3) -0.0357(2) 0.5727(3) 0.0308(5) Uani 1 1 d . . .
O3 O 0.3498(3) 0.2272(2) 0.6810(3) 0.0305(5) Uani 1 1 d . . .
O4 O -0.0294(2) 0.0385(3) 0.7655(2) 0.0283(5) Uani 1 1 d . . .
O5 O 0.2507(2) 0.0272(3) 0.8712(2) 0.0286(5) Uani 1 1 d . . .
O6 O 0.1858(3) 0.3167(2) 0.8302(3) 0.0331(6) Uani 1 1 d . . .
O7 O 0.2299(3) -0.2696(3) 0.5450(3) 0.0345(6) Uani 1 1 d . . .
O8 O 0.1992(3) -0.1374(2) 0.9942(3) 0.0304(5) Uani 1 1 d . . .
O9 O -0.0876(2) -0.1212(2) 0.8908(2) 0.0271(5) Uani 1 1 d . . .
O10 O 0.4957(3) 0.4211(3) 0.7288(3) 0.0437(7) Uani 1 1 d . . .
O11 O 0.3126(4) 0.5213(3) 0.8604(4) 0.0540(9) Uani 1 1 d . . .
C1 C 0.1637(3) -0.0543(3) 0.9118(3) 0.0215(6) Uani 1 1 d . . .
C2 C 0.0015(3) -0.0463(3) 0.8526(3) 0.0217(6) Uani 1 1 d . . .
C3 C 0.2886(4) 0.4040(4) 0.8170(4) 0.0307(7) Uani 1 1 d . . .
C4 C 0.3875(4) 0.3479(4) 0.7353(4) 0.0295(7) Uani 1 1 d . . .
C14 C 0.4790(3) 0.7017(3) 0.7269(3) 0.0257(6) Uani 1 1 d . . .
H14A H 0.3894 0.7133 0.6644 0.031 Uiso 1 1 calc R . .
H14B H 0.4698 0.6103 0.7537 0.031 Uiso 1 1 calc R . .
C10 C 0.9813(3) 0.3556(3) 0.9747(3) 0.0214(6) Uani 1 1 d . . .
H10A H 1.0636 0.3423 0.9414 0.026 Uiso 1 1 calc R . .
H10B H 0.9276 0.2676 0.9754 0.026 Uiso 1 1 calc R . .
C12 C 0.6495(3) 0.9588(3) 0.7464(3) 0.0206(6) Uani 1 1 d . . .
H12A H 0.7363 0.9431 0.8104 0.025 Uiso 1 1 calc R . .
H12B H 0.6633 1.0510 0.7224 0.025 Uiso 1 1 calc R . .
N2 N 0.5290(4) 0.9417(4) 0.8091(4) 0.0460(9) Uani 1 1 d . . .
H2A H 0.4492 0.9605 0.7515 0.055 Uiso 1 1 calc R . .
H2B H 0.5481 0.9999 0.8829 0.055 Uiso 1 1 calc R . .
C11 C 1.0305(5) 0.4225(4) 1.1134(4) 0.0377(8) Uani 1 1 d . . .
H11A H 1.0932 0.3684 1.1700 0.045 Uiso 1 1 calc R . .
H11B H 0.9487 0.4289 1.1496 0.045 Uiso 1 1 calc R . .
N3 N 0.5959(4) 0.7201(4) 0.6584(5) 0.0601(11) Uani 1 1 d . . .
H3A H 0.5723 0.6644 0.5825 0.072 Uiso 1 1 calc R . .
H3B H 0.6765 0.6977 0.7119 0.072 Uiso 1 1 calc R . .
C13 C 0.6230(5) 0.8640(4) 0.6247(4) 0.0400(9) Uani 1 1 d . . .
H13A H 0.7054 0.8750 0.5877 0.048 Uiso 1 1 calc R . .
H13B H 0.5408 0.8845 0.5576 0.048 Uiso 1 1 calc R . .
N1 N 0.8907(4) 0.4380(4) 0.8856(4) 0.0541(10) Uani 1 1 d . . .
H1A H 0.8108 0.4446 0.9126 0.065 Uiso 1 1 calc R . .
H1B H 0.8648 0.3976 0.8015 0.065 Uiso 1 1 calc R . .
C15 C 0.5050(4) 0.7989(4) 0.8469(4) 0.0385(9) Uani 1 1 d . . .
H15A H 0.5884 0.7809 0.9142 0.046 Uiso 1 1 calc R . .
H15B H 0.4234 0.7879 0.8848 0.046 Uiso 1 1 calc R . .
O100 O 0.3389(4) 0.7888(3) 0.3338(3) 0.0465(7) Uani 1 1 d D . .
O200 O 0.1796(6) 0.4504(4) 0.4438(5) 0.0766(13) Uani 1 1 d D . .
H101 H 0.282(4) 0.761(5) 0.380(4) 0.043(13) Uiso 1 1 d D . .
H102 H 0.405(4) 0.746(5) 0.322(6) 0.067(18) Uiso 1 1 d D . .
H201 H 0.204(6) 0.453(6) 0.5287(13) 0.056(17) Uiso 1 1 d D . .
H202 H 0.166(14) 0.532(4) 0.457(13) 0.22(6) Uiso 1 1 d D . .
 
loop_
 _atom_site_aniso_label
 _atom_site_aniso_U_11
 _atom_site_aniso_U_22
 _atom_site_aniso_U_33
 _atom_site_aniso_U_23
 _atom_site_aniso_U_13
 _atom_site_aniso_U_12
In1 0.02005(12) 0.01856(12) 0.02449(13) 0.00226(8) 0.00816(8) 0.00165(8)
P1 0.0250(4) 0.0201(4) 0.0250(4) 0.0030(3) 0.0070(3) 0.0042(3)
O1 0.0311(13) 0.0245(12) 0.0444(15) 0.0098(11) -0.0019(11) 0.0016(10)
O2 0.0378(13) 0.0216(11) 0.0347(13) -0.0022(10) 0.0147(11) 0.0009(10)
O3 0.0277(12) 0.0248(12) 0.0431(14) -0.0014(10) 0.0187(11) 0.0008(10)
O4 0.0189(11) 0.0350(13) 0.0339(12) 0.0131(10) 0.0094(9) 0.0059(9)
O5 0.0192(11) 0.0357(13) 0.0316(12) 0.0107(10) 0.0071(9) 0.0018(9)
O6 0.0362(13) 0.0252(12) 0.0430(14) -0.0053(10) 0.0242(12) -0.0018(10)
O7 0.0315(13) 0.0281(12) 0.0448(15) 0.0024(11) 0.0087(11) 0.0108(10)
O8 0.0257(12) 0.0293(12) 0.0351(13) 0.0111(10) 0.0045(10) 0.0025(10)
O9 0.0221(11) 0.0266(11) 0.0344(12) 0.0057(10) 0.0117(10) 0.0000(9)
O10 0.0324(14) 0.0282(13) 0.075(2) -0.0019(13) 0.0285(14) -0.0067(11)
O11 0.061(2) 0.0276(14) 0.080(2) -0.0164(15) 0.0426(18) -0.0100(13)
C1 0.0203(14) 0.0219(14) 0.0214(14) -0.0005(11) 0.0049(11) 0.0015(11)
C2 0.0214(14) 0.0220(14) 0.0227(14) -0.0004(11) 0.0081(12) 0.0029(12)
C3 0.0303(17) 0.0277(17) 0.0354(18) -0.0031(14) 0.0142(14) -0.0005(14)
C4 0.0257(16) 0.0267(16) 0.0383(18) 0.0024(14) 0.0129(14) 0.0032(13)
C14 0.0192(14) 0.0179(14) 0.0365(17) 0.0045(13) 0.0017(13) -0.0003(11)
C10 0.0267(15) 0.0115(12) 0.0292(15) 0.0010(11) 0.0142(12) 0.0003(11)
C12 0.0133(12) 0.0229(14) 0.0236(14) 0.0000(11) 0.0036(11) -0.0020(11)
N2 0.0329(17) 0.046(2) 0.058(2) -0.0091(17) 0.0165(16) -0.0001(15)
C11 0.052(2) 0.0302(18) 0.0318(18) 0.0075(15) 0.0107(17) 0.0090(17)
N3 0.046(2) 0.053(2) 0.079(3) -0.017(2) 0.016(2) 0.0063(19)
C13 0.040(2) 0.046(2) 0.0329(19) -0.0058(17) 0.0129(16) -0.0047(17)
N1 0.052(2) 0.046(2) 0.054(2) -0.0029(18) -0.0001(18) -0.0020(18)
C15 0.0351(19) 0.044(2) 0.0349(19) 0.0044(16) 0.0107(16) -0.0064(17)
O100 0.0490(18) 0.0410(16) 0.062(2) 0.0105(14) 0.0317(16) 0.0141(14)
O200 0.107(4) 0.046(2) 0.090(3) -0.004(2) 0.055(3) 0.000(2)
 
_geom_special_details
;
 All esds (except the esd in the dihedral angle between two l.s. planes)
 are estimated using the full covariance matrix.  The cell esds are taken
 into account individually in the estimation of esds in distances, angles
 and torsion angles; correlations between esds in cell parameters are only
 used when they are defined by crystal symmetry.  An approximate (isotropic)
 treatment of cell esds is used for estimating esds involving l.s. planes.
;
 
loop_
 _geom_bond_atom_site_label_1
 _geom_bond_atom_site_label_2
 _geom_bond_distance
 _geom_bond_site_symmetry_2
 _geom_bond_publ_flag
In1 O1 2.091(2) . ?
In1 O2 2.103(2) . ?
In1 O3 2.136(2) . ?
In1 O4 2.151(2) . ?
In1 O5 2.184(2) . ?
In1 O6 2.188(2) . ?
P1 O7 1.507(3) . ?
P1 O1 1.520(3) 2_556 ?
P1 O2 1.520(2) . ?
O1 P1 1.520(3) 2_556 ?
O3 C4 1.274(4) . ?
O4 C2 1.276(4) . ?
O5 C1 1.269(4) . ?
O6 C3 1.287(4) . ?
O8 C1 1.238(4) . ?
O9 C2 1.233(4) . ?
O10 C4 1.229(4) . ?
O11 C3 1.207(4) . ?
C1 C2 1.558(4) . ?
C3 C4 1.564(5) . ?
C14 C15 1.484(5) . ?
C14 N3 1.485(5) . ?
C10 N1 1.468(5) . ?
C10 C11 1.486(5) . ?
C12 N2 1.475(4) . ?
C12 C13 1.482(5) . ?
N2 C15 1.508(5) . ?
C11 N1 1.508(5) 2_767 ?
N3 C13 1.507(6) . ?
N1 C11 1.508(5) 2_767 ?
 
loop_
 _geom_angle_atom_site_label_1
 _geom_angle_atom_site_label_2
 _geom_angle_atom_site_label_3
 _geom_angle
 _geom_angle_site_symmetry_1
 _geom_angle_site_symmetry_3
 _geom_angle_publ_flag
O1 In1 O2 96.19(11) . . ?
O1 In1 O3 95.68(10) . . ?
O2 In1 O3 89.56(9) . . ?
O1 In1 O4 94.52(10) . . ?
O2 In1 O4 97.80(10) . . ?
O3 In1 O4 166.71(10) . . ?
O1 In1 O5 170.57(10) . . ?
O2 In1 O5 88.75(10) . . ?
O3 In1 O5 92.37(9) . . ?
O4 In1 O5 76.82(9) . . ?
O1 In1 O6 88.06(11) . . ?
O2 In1 O6 165.82(10) . . ?
O3 In1 O6 76.53(9) . . ?
O4 In1 O6 95.34(9) . . ?
O5 In1 O6 89.05(10) . . ?
O7 P1 O1 112.02(16) . 2_556 ?
O7 P1 O2 112.03(15) . . ?
O1 P1 O2 112.88(14) 2_556 . ?
P1 O1 In1 134.87(15) 2_556 . ?
P1 O2 In1 134.33(15) . . ?
C4 O3 In1 115.9(2) . . ?
C2 O4 In1 114.66(19) . . ?
C1 O5 In1 113.7(2) . . ?
C3 O6 In1 114.4(2) . . ?
O8 C1 O5 124.6(3) . . ?
O8 C1 C2 119.0(3) . . ?
O5 C1 C2 116.4(3) . . ?
O9 C2 O4 124.4(3) . . ?
O9 C2 C1 119.1(3) . . ?
O4 C2 C1 116.5(3) . . ?
O11 C3 O6 126.0(3) . . ?
O11 C3 C4 119.3(3) . . ?
O6 C3 C4 114.6(3) . . ?
O10 C4 O3 124.6(3) . . ?
O10 C4 C3 118.6(3) . . ?
O3 C4 C3 116.8(3) . . ?
C15 C14 N3 112.2(3) . . ?
N1 C10 C11 110.7(3) . . ?
N2 C12 C13 111.4(3) . . ?
C12 N2 C15 110.3(3) . . ?
C10 C11 N1 110.6(3) . 2_767 ?
C14 N3 C13 111.3(3) . . ?
C12 C13 N3 110.4(3) . . ?
C10 N1 C11 110.7(3) . 2_767 ?
C14 C15 N2 110.1(3) . . ?
 
_diffrn_measured_fraction_theta_max    0.954
_diffrn_reflns_theta_full              28.04
_diffrn_measured_fraction_theta_full   0.954
_refine_diff_density_max    0.829
_refine_diff_density_min   -0.787
_refine_diff_density_rms    0.117

####EOF#####
data_compoundII
 
_audit_creation_method            SHELXL-97
_chemical_name_systematic
;
 ?
;
_chemical_name_common             Indiumoxalatephosphite
_chemical_melting_point           ?
_chemical_formula_moiety          ?
_chemical_formula_sum             'C6 H6 F0 In N O5 P S0'
_chemical_formula_weight          317.91
 
loop_
 _atom_type_symbol
 _atom_type_description
 _atom_type_scat_dispersion_real
 _atom_type_scat_dispersion_imag
 _atom_type_scat_source
 'C'  'C'   0.0033   0.0016
 'International Tables Vol C Tables 4.2.6.8 and 6.1.1.4'
 'H'  'H'   0.0000   0.0000
 'International Tables Vol C Tables 4.2.6.8 and 6.1.1.4'
 'N'  'N'   0.0061   0.0033
 'International Tables Vol C Tables 4.2.6.8 and 6.1.1.4'
 'O'  'O'   0.0106   0.0060
 'International Tables Vol C Tables 4.2.6.8 and 6.1.1.4'
 'F'  'F'   0.0171   0.0103
 'International Tables Vol C Tables 4.2.6.8 and 6.1.1.4'
 'P'  'P'   0.1023   0.0942
 'International Tables Vol C Tables 4.2.6.8 and 6.1.1.4'
 'S'  'S'   0.1246   0.1234
 'International Tables Vol C Tables 4.2.6.8 and 6.1.1.4'
 'In'  'In'  -0.7276   1.3100
 'International Tables Vol C Tables 4.2.6.8 and 6.1.1.4'
 
_symmetry_cell_setting            Monoclinic
_symmetry_space_group_name_H-M    P2(1)/c
 
loop_
 _symmetry_equiv_pos_as_xyz
 'x, y, z'
 '-x, y+1/2, -z+1/2'
 '-x, -y, -z'
 'x, -y-1/2, z-1/2'
 
_cell_length_a                    8.9931(18)
_cell_length_b                    9.2163(18)
_cell_length_c                    11.988(2)
_cell_angle_alpha                 90.00
_cell_angle_beta                  96.907(3)
_cell_angle_gamma                 90.00
_cell_volume                      986.4(3)
_cell_formula_units_Z             4
_cell_measurement_temperature     293(2)
_cell_measurement_reflns_used     2291
_cell_measurement_theta_min       2.28
_cell_measurement_theta_max       27.98
 
_exptl_crystal_description        hexagon
_exptl_crystal_colour             colorless
_exptl_crystal_size_max           0.16
_exptl_crystal_size_mid           0.14
_exptl_crystal_size_min           0.08
_exptl_crystal_density_meas       ?
_exptl_crystal_density_diffrn     2.141
_exptl_crystal_density_method     'not measured'
_exptl_crystal_F_000              612
_exptl_absorpt_coefficient_mu     2.553
_exptl_absorpt_correction_type    ‘Multi-scan’
_exptl_absorpt_correction_T_min   0.6855
_exptl_absorpt_correction_T_max   0.8218
_exptl_absorpt_process_details    ‘(SADABS;Sheldrick,1996)’
 
_exptl_special_details
;
 ?
;
 
_diffrn_ambient_temperature       293(2)
_diffrn_radiation_wavelength      0.71073
_diffrn_radiation_type            MoK\a
_diffrn_radiation_source          'fine-focus sealed tube'
_diffrn_radiation_monochromator   graphite
_diffrn_measurement_device_type   ‘BrukerSMARTCCDareadetector’
_diffrn_measurement_method        ‘\fand\wscans’
_diffrn_detector_area_resol_mean  ?
_diffrn_standards_number          ?
_diffrn_standards_interval_count  ?
_diffrn_standards_interval_time   ?
_diffrn_standards_decay_%         ?
_diffrn_reflns_number             8253
_diffrn_reflns_av_R_equivalents   0.0283
_diffrn_reflns_av_sigmaI/netI     0.0306
_diffrn_reflns_limit_h_min        -11
_diffrn_reflns_limit_h_max        11
_diffrn_reflns_limit_k_min        -10
_diffrn_reflns_limit_k_max        11
_diffrn_reflns_limit_l_min        -15
_diffrn_reflns_limit_l_max        15
_diffrn_reflns_theta_min          2.28
_diffrn_reflns_theta_max          27.98
_reflns_number_total              2291
_reflns_number_gt                 1946
_reflns_threshold_expression      >2sigma(I)
 
_computing_data_collection        ‘SMART(Bruker,2000)’
_computing_cell_refinement        ‘SMART’
_computing_data_reduction         ‘SAINT(Bruker,2000)’
_computing_structure_solution     ‘SIR92(Altomareetal.,1993)’
_computing_structure_refinement   'SHELXL-97 (Sheldrick, 1997)'
_computing_molecular_graphics     ?
_computing_publication_material   ?
 
_refine_special_details
;
 Refinement of F^2^ against ALL reflections.  The weighted R-factor wR and
 goodness of fit S are based on F^2^, conventional R-factors R are based
 on F, with F set to zero for negative F^2^. The threshold expression of
 F^2^ > 2sigma(F^2^) is used only for calculating R-factors(gt) etc. and is
 not relevant to the choice of reflections for refinement.  R-factors based
 on F^2^ are statistically about twice as large as those based on F, and R-
 factors based on ALL data will be even larger.
;
 
_refine_ls_structure_factor_coef  Fsqd
_refine_ls_matrix_type            full
_refine_ls_weighting_scheme       calc
_refine_ls_weighting_details
 'calc w=1/[\s^2^(Fo^2^)+(0.0398P)^2^+4.5394P] where P=(Fo^2^+2Fc^2^)/3'
_atom_sites_solution_primary      direct
_atom_sites_solution_secondary    difmap
_atom_sites_solution_hydrogens    geom
_refine_ls_hydrogen_treatment     ?
_refine_ls_extinction_method      ?
_refine_ls_extinction_coef        ?
_refine_ls_number_reflns          2291
_refine_ls_number_parameters      127
_refine_ls_number_restraints      0
_refine_ls_R_factor_all           0.0506
_refine_ls_R_factor_gt            0.0402
_refine_ls_wR_factor_ref          0.0980
_refine_ls_wR_factor_gt           0.0927
_refine_ls_goodness_of_fit_ref    1.052
_refine_ls_restrained_S_all       1.052
_refine_ls_shift/su_max           0.001
_refine_ls_shift/su_mean          0.000
 
loop_
 _atom_site_label
 _atom_site_type_symbol
 _atom_site_fract_x
 _atom_site_fract_y
 _atom_site_fract_z
 _atom_site_U_iso_or_equiv
 _atom_site_adp_type
 _atom_site_occupancy
 _atom_site_symmetry_multiplicity
 _atom_site_calc_flag
 _atom_site_refinement_flags
 _atom_site_disorder_assembly
 _atom_site_disorder_group
In1 In 0.09874(4) 0.23415(4) 0.60503(3) 0.02812(13) Uani 1 1 d . . .
P1 P -0.03078(15) -0.09327(14) 0.65279(11) 0.0279(3) Uani 1 1 d . . .
H10 H 0.0670 -0.1404 0.6538 0.034 Uiso 1 1 calc R . .
O1 O 0.1079(7) 0.3473(7) 0.7534(5) 0.086(2) Uani 1 1 d . . .
O2 O -0.0075(6) 0.0650(5) 0.6770(5) 0.0740(17) Uani 1 1 d . . .
O3 O 0.1194(5) 0.1185(7) 0.4583(4) 0.0701(16) Uani 1 1 d . . .
O4 O -0.1053(4) 0.3519(4) 0.5390(4) 0.0441(10) Uani 1 1 d . . .
O5 O 0.1837(4) 0.4329(5) 0.5302(4) 0.0496(11) Uani 1 1 d . . .
N1 N 0.3353(5) 0.1712(6) 0.6628(4) 0.0396(11) Uani 1 1 d . . .
C10 C -0.0840(6) 0.4772(6) 0.5027(5) 0.0394(13) Uani 1 1 d . . .
C5 C 0.4392(8) 0.1765(10) 0.5938(7) 0.067(2) Uani 1 1 d . . .
H5 H 0.4103 0.1978 0.5185 0.080 Uiso 1 1 calc R . .
C1 C 0.3769(9) 0.1355(10) 0.7696(6) 0.072(2) Uani 1 1 d . . .
H1 H 0.3047 0.1306 0.8189 0.086 Uiso 1 1 calc R . .
C2 C 0.5240(11) 0.1056(13) 0.8091(8) 0.098(4) Uani 1 1 d . . .
H2 H 0.5499 0.0785 0.8836 0.118 Uiso 1 1 calc R . .
C3 C 0.6313(10) 0.1159(11) 0.7384(9) 0.088(3) Uani 1 1 d . . .
H3 H 0.7314 0.0989 0.7645 0.105 Uiso 1 1 calc R . .
C4 C 0.5895(9) 0.1516(13) 0.6292(9) 0.092(3) Uani 1 1 d . . .
H4 H 0.6604 0.1592 0.5791 0.110 Uiso 1 1 calc R . .
 
loop_
 _atom_site_aniso_label
 _atom_site_aniso_U_11
 _atom_site_aniso_U_22
 _atom_site_aniso_U_33
 _atom_site_aniso_U_23
 _atom_site_aniso_U_13
 _atom_site_aniso_U_12
In1 0.0362(2) 0.0259(2) 0.0232(2) -0.00655(13) 0.00773(14) -0.00568(14)
P1 0.0336(7) 0.0265(6) 0.0234(6) 0.0032(5) 0.0022(5) -0.0031(5)
O1 0.093(4) 0.108(5) 0.060(3) -0.055(3) 0.025(3) -0.007(4)
O2 0.076(3) 0.038(3) 0.119(5) -0.007(3) 0.055(3) -0.018(2)
O3 0.048(3) 0.123(5) 0.040(3) -0.041(3) 0.008(2) -0.003(3)
O4 0.033(2) 0.036(2) 0.063(3) 0.0105(19) 0.0037(18) -0.0114(17)
O5 0.029(2) 0.048(3) 0.070(3) 0.024(2) -0.0022(19) -0.0090(18)
N1 0.039(3) 0.044(3) 0.036(3) 0.002(2) 0.004(2) 0.004(2)
C10 0.033(3) 0.039(3) 0.046(3) 0.008(3) 0.001(2) -0.011(2)
C5 0.052(4) 0.097(6) 0.053(4) 0.020(4) 0.014(3) 0.014(4)
C1 0.060(5) 0.113(7) 0.040(4) 0.012(4) 0.001(3) 0.025(5)
C2 0.081(6) 0.147(10) 0.061(5) 0.006(6) -0.016(5) 0.050(7)
C3 0.056(5) 0.111(8) 0.092(7) -0.010(6) -0.010(5) 0.035(5)
C4 0.049(5) 0.132(9) 0.099(7) 0.027(7) 0.026(5) 0.027(5)
 
_geom_special_details
;
 All esds (except the esd in the dihedral angle between two l.s. planes)
 are estimated using the full covariance matrix.  The cell esds are taken
 into account individually in the estimation of esds in distances, angles
 and torsion angles; correlations between esds in cell parameters are only
 used when they are defined by crystal symmetry.  An approximate (isotropic)
 treatment of cell esds is used for estimating esds involving l.s. planes.
;
 
loop_
 _geom_bond_atom_site_label_1
 _geom_bond_atom_site_label_2
 _geom_bond_distance
 _geom_bond_site_symmetry_2
 _geom_bond_publ_flag
In1 O1 2.055(5) . ?
In1 O2 2.071(4) . ?
In1 O3 2.084(4) . ?
In1 O4 2.196(4) . ?
In1 O5 2.215(4) . ?
In1 N1 2.233(5) . ?
P1 O3 1.486(5) 3_556 ?
P1 O1 1.494(5) 2_546 ?
P1 O2 1.497(5) . ?
O1 P1 1.494(5) 2_556 ?
O3 P1 1.486(5) 3_556 ?
O4 C10 1.257(7) . ?
O5 C10 1.249(7) 3_566 ?
N1 C5 1.321(8) . ?
N1 C1 1.332(8) . ?
C10 O5 1.249(7) 3_566 ?
C10 C10 1.577(10) 3_566 ?
C5 C4 1.386(10) . ?
C1 C2 1.379(11) . ?
C2 C3 1.362(13) . ?
C3 C4 1.359(13) . ?
 
loop_
 _geom_angle_atom_site_label_1
 _geom_angle_atom_site_label_2
 _geom_angle_atom_site_label_3
 _geom_angle
 _geom_angle_site_symmetry_1
 _geom_angle_site_symmetry_3
 _geom_angle_publ_flag
O1 In1 O2 89.6(2) . . ?
O1 In1 O3 172.6(2) . . ?
O2 In1 O3 93.4(2) . . ?
O1 In1 O4 90.3(2) . . ?
O2 In1 O4 96.57(19) . . ?
O3 In1 O4 95.98(19) . . ?
O1 In1 O5 87.2(2) . . ?
O2 In1 O5 171.97(18) . . ?
O3 In1 O5 90.6(2) . . ?
O4 In1 O5 76.09(14) . . ?
O1 In1 N1 85.8(2) . . ?
O2 In1 N1 98.4(2) . . ?
O3 In1 N1 87.15(18) . . ?
O4 In1 N1 164.54(16) . . ?
O5 In1 N1 88.76(17) . . ?
O3 P1 O1 111.7(3) 3_556 2_546 ?
O3 P1 O2 112.0(4) 3_556 . ?
O1 P1 O2 106.1(4) 2_546 . ?
P1 O1 In1 149.7(4) 2_556 . ?
P1 O2 In1 135.5(3) . . ?
P1 O3 In1 138.1(3) 3_556 . ?
C10 O4 In1 115.0(3) . . ?
C10 O5 In1 114.0(3) 3_566 . ?
C5 N1 C1 118.3(6) . . ?
C5 N1 In1 121.0(4) . . ?
C1 N1 In1 120.6(4) . . ?
O5 C10 O4 125.8(5) 3_566 . ?
O5 C10 C10 117.7(6) 3_566 3_566 ?
O4 C10 C10 116.5(6) . 3_566 ?
N1 C5 C4 122.6(7) . . ?
N1 C1 C2 121.8(8) . . ?
C3 C2 C1 119.7(8) . . ?
C4 C3 C2 118.8(8) . . ?
C3 C4 C5 118.8(8) . . ?
 
_diffrn_measured_fraction_theta_max    0.968
_diffrn_reflns_theta_full              27.98
_diffrn_measured_fraction_theta_full   0.968
_refine_diff_density_max    1.704
_refine_diff_density_min   -1.172
_refine_diff_density_rms    0.142

#####EOF#####


data_compoundIII
 
_audit_creation_method            SHELXL-97
_chemical_name_systematic
;
 ?
;
_chemical_name_common             Indiumphosphiteoxalate
_chemical_melting_point           ?
_chemical_formula_moiety          ?
_chemical_formula_sum             'C6 H6 F0 In N O5 P S0'
_chemical_formula_weight          317.91
 
loop_
 _atom_type_symbol
 _atom_type_description
 _atom_type_scat_dispersion_real
 _atom_type_scat_dispersion_imag
 _atom_type_scat_source
 'C'  'C'   0.0033   0.0016
 'International Tables Vol C Tables 4.2.6.8 and 6.1.1.4'
 'H'  'H'   0.0000   0.0000
 'International Tables Vol C Tables 4.2.6.8 and 6.1.1.4'
 'N'  'N'   0.0061   0.0033
 'International Tables Vol C Tables 4.2.6.8 and 6.1.1.4'
 'O'  'O'   0.0106   0.0060
 'International Tables Vol C Tables 4.2.6.8 and 6.1.1.4'
 'F'  'F'   0.0171   0.0103
 'International Tables Vol C Tables 4.2.6.8 and 6.1.1.4'
 'P'  'P'   0.1023   0.0942
 'International Tables Vol C Tables 4.2.6.8 and 6.1.1.4'
 'S'  'S'   0.1246   0.1234
 'International Tables Vol C Tables 4.2.6.8 and 6.1.1.4'
 'In'  'In'  -0.7276   1.3100
 'International Tables Vol C Tables 4.2.6.8 and 6.1.1.4'
 
_symmetry_cell_setting            Monoclinic
_symmetry_space_group_name_H-M    P2(1)/n
 
loop_
 _symmetry_equiv_pos_as_xyz
 'x, y, z'
 '-x+1/2, y+1/2, -z+1/2'
 '-x, -y, -z'
 'x-1/2, -y-1/2, z-1/2'
 
_cell_length_a                    10.7198(18)
_cell_length_b                    6.5947(11)
_cell_length_c                    13.771(2)
_cell_angle_alpha                 90.00
_cell_angle_beta                  105.104(3)
_cell_angle_gamma                 90.00
_cell_volume                      939.9(3)
_cell_formula_units_Z             4
_cell_measurement_temperature     293(2)
_cell_measurement_reflns_used     2210
_cell_measurement_theta_min       2.16
_cell_measurement_theta_max       27.99
 
_exptl_crystal_description        plate-like
_exptl_crystal_colour             colorless
_exptl_crystal_size_max           0.24
_exptl_crystal_size_mid           0.12
_exptl_crystal_size_min           0.08
_exptl_crystal_density_meas       ?
_exptl_crystal_density_diffrn     2.247
_exptl_crystal_density_method     'not measured'
_exptl_crystal_F_000              612
_exptl_absorpt_coefficient_mu     2.679
_exptl_absorpt_correction_type    ‘Multi-scan’
_exptl_absorpt_correction_T_min   0.5657
_exptl_absorpt_correction_T_max   0.8142
_exptl_absorpt_process_details    SADABS;Sheldrick1996
 
_exptl_special_details
;
 ?
;
 
_diffrn_ambient_temperature       293(2)
_diffrn_radiation_wavelength      0.71073
_diffrn_radiation_type            MoK\a
_diffrn_radiation_source          'fine-focus sealed tube'
_diffrn_radiation_monochromator   graphite
_diffrn_measurement_device_type   ‘BrukerSMARTCCDareadetector’
_diffrn_measurement_method        ‘\fand\wscans’
_diffrn_detector_area_resol_mean  ?
_diffrn_standards_number          ?
_diffrn_standards_interval_count  ?
_diffrn_standards_interval_time   ?
_diffrn_standards_decay_%         ?
_diffrn_reflns_number             7835
_diffrn_reflns_av_R_equivalents   0.0366
_diffrn_reflns_av_sigmaI/netI     0.0403
_diffrn_reflns_limit_h_min        -14
_diffrn_reflns_limit_h_max        14
_diffrn_reflns_limit_k_min        -8
_diffrn_reflns_limit_k_max        8
_diffrn_reflns_limit_l_min        -17
_diffrn_reflns_limit_l_max        17
_diffrn_reflns_theta_min          2.16
_diffrn_reflns_theta_max          27.99
_reflns_number_total              2210
_reflns_number_gt                 1771
_reflns_threshold_expression      >2sigma(I)
 
_computing_data_collection        ‘SMART(Bruker,2000)’
_computing_cell_refinement        ‘SMART’
_computing_data_reduction         ‘SAINT(Bruker,2000)’
_computing_structure_solution     ‘SIR92(Altomareetal,1993)’
_computing_structure_refinement   'SHELXL-97 (Sheldrick, 1997)'
_computing_molecular_graphics     ?
_computing_publication_material   ?
 
_refine_special_details
;
 Refinement of F^2^ against ALL reflections.  The weighted R-factor wR and
 goodness of fit S are based on F^2^, conventional R-factors R are based
 on F, with F set to zero for negative F^2^. The threshold expression of
 F^2^ > 2sigma(F^2^) is used only for calculating R-factors(gt) etc. and is
 not relevant to the choice of reflections for refinement.  R-factors based
 on F^2^ are statistically about twice as large as those based on F, and R-
 factors based on ALL data will be even larger.
;
 
_refine_ls_structure_factor_coef  Fsqd
_refine_ls_matrix_type            full
_refine_ls_weighting_scheme       calc
_refine_ls_weighting_details
 'calc w=1/[\s^2^(Fo^2^)+(0.0262P)^2^+0.0491P] where P=(Fo^2^+2Fc^2^)/3'
_atom_sites_solution_primary      direct
_atom_sites_solution_secondary    difmap
_atom_sites_solution_hydrogens    geom
_refine_ls_hydrogen_treatment     mixed
_refine_ls_extinction_method      none
_refine_ls_extinction_coef        ?
_refine_ls_number_reflns          2210
_refine_ls_number_parameters      147
_refine_ls_number_restraints      0
_refine_ls_R_factor_all           0.0478
_refine_ls_R_factor_gt            0.0316
_refine_ls_wR_factor_ref          0.0650
_refine_ls_wR_factor_gt           0.0591
_refine_ls_goodness_of_fit_ref    1.057
_refine_ls_restrained_S_all       1.057
_refine_ls_shift/su_max           0.000
_refine_ls_shift/su_mean          0.000
 
loop_
 _atom_site_label
 _atom_site_type_symbol
 _atom_site_fract_x
 _atom_site_fract_y
 _atom_site_fract_z
 _atom_site_U_iso_or_equiv
 _atom_site_adp_type
 _atom_site_occupancy
 _atom_site_symmetry_multiplicity
 _atom_site_calc_flag
 _atom_site_refinement_flags
 _atom_site_disorder_assembly
 _atom_site_disorder_group
In1 In 0.57659(2) 0.04968(4) 0.21367(2) 0.02271(10) Uani 1 1 d . . .
P1 P 0.60698(9) 0.55810(15) 0.17066(8) 0.0250(2) Uani 1 1 d . . .
H10 H 0.5638 0.5756 0.0991 0.030 Uiso 1 1 calc R . .
O1 O 0.7511(3) 0.0592(5) 0.3224(2) 0.0390(7) Uani 1 1 d . . .
O2 O 0.5562(3) 0.3638(5) 0.2007(3) 0.0503(9) Uani 1 1 d . . .
O3 O 0.5627(3) -0.2672(4) 0.2233(2) 0.0413(8) Uani 1 1 d . . .
O4 O 0.6551(2) 0.0289(4) 0.0813(2) 0.0303(6) Uani 1 1 d . . .
O5 O 0.4028(2) 0.0271(4) 0.0838(2) 0.0311(7) Uani 1 1 d . . .
N1 N 0.4493(3) 0.0710(5) 0.3182(3) 0.0310(8) Uani 1 1 d . . .
C1 C 0.3675(5) -0.0769(9) 0.3250(4) 0.0534(14) Uani 1 1 d . . .
H1 H 0.360(4) -0.184(7) 0.279(3) 0.056(16) Uiso 1 1 d . . .
C2 C 0.4540(6) 0.2329(8) 0.3768(4) 0.0555(14) Uani 1 1 d . . .
H2 H 0.524(5) 0.342(9) 0.376(4) 0.10(2) Uiso 1 1 d . . .
C3 C 0.2900(6) -0.0644(11) 0.3904(5) 0.072(2) Uani 1 1 d . . .
H3 H 0.230(6) -0.165(10) 0.387(5) 0.11(2) Uiso 1 1 d . . .
C4 C 0.2966(6) 0.1000(10) 0.4519(5) 0.0654(18) Uani 1 1 d . . .
H4 H 0.244(5) 0.108(8) 0.499(4) 0.081(19) Uiso 1 1 d . . .
C5 C 0.3791(7) 0.2511(10) 0.4439(4) 0.0700(18) Uani 1 1 d . . .
H5 H 0.401(7) 0.370(11) 0.490(5) 0.13(3) Uiso 1 1 d . . .
C10 C 0.5733(4) 0.0014(5) -0.0006(3) 0.0248(9) Uani 1 1 d . . .
 
loop_
 _atom_site_aniso_label
 _atom_site_aniso_U_11
 _atom_site_aniso_U_22
 _atom_site_aniso_U_33
 _atom_site_aniso_U_23
 _atom_site_aniso_U_13
 _atom_site_aniso_U_12
In1 0.02609(15) 0.01199(15) 0.03380(17) -0.00062(13) 0.01451(11) -0.00035(12)
P1 0.0267(5) 0.0146(5) 0.0331(6) -0.0004(5) 0.0071(4) -0.0008(4)
O1 0.0268(14) 0.052(2) 0.0402(17) -0.0031(15) 0.0128(13) -0.0011(14)
O2 0.056(2) 0.0134(15) 0.092(3) 0.0015(17) 0.0382(19) -0.0006(14)
O3 0.0553(19) 0.0118(14) 0.068(2) -0.0015(14) 0.0364(17) 0.0010(13)
O4 0.0251(14) 0.0346(17) 0.0341(16) 0.0018(13) 0.0129(12) -0.0024(12)
O5 0.0248(14) 0.0386(18) 0.0341(16) -0.0011(13) 0.0153(12) 0.0010(12)
N1 0.0290(17) 0.030(2) 0.039(2) -0.0018(16) 0.0176(15) 0.0008(15)
C1 0.056(3) 0.049(4) 0.064(4) -0.011(3) 0.032(3) -0.019(3)
C2 0.073(4) 0.047(3) 0.061(3) -0.017(3) 0.043(3) -0.009(3)
C3 0.064(4) 0.075(5) 0.099(5) 0.003(4) 0.057(4) -0.019(3)
C4 0.063(4) 0.081(5) 0.067(4) 0.009(3) 0.043(3) 0.023(3)
C5 0.092(5) 0.073(4) 0.060(4) -0.024(3) 0.047(3) -0.002(4)
C10 0.029(2) 0.014(2) 0.035(2) 0.0042(15) 0.0139(18) 0.0007(15)
 
_geom_special_details
;
 All esds (except the esd in the dihedral angle between two l.s. planes)
 are estimated using the full covariance matrix.  The cell esds are taken
 into account individually in the estimation of esds in distances, angles
 and torsion angles; correlations between esds in cell parameters are only
 used when they are defined by crystal symmetry.  An approximate (isotropic)
 treatment of cell esds is used for estimating esds involving l.s. planes.
;
 
loop_
 _geom_bond_atom_site_label_1
 _geom_bond_atom_site_label_2
 _geom_bond_distance
 _geom_bond_site_symmetry_2
 _geom_bond_publ_flag
In1 O1 2.070(3) . ?
In1 O2 2.086(3) . ?
In1 O3 2.102(3) . ?
In1 O4 2.202(3) . ?
In1 O5 2.226(3) . ?
In1 N1 2.231(3) . ?
P1 O2 1.493(3) . ?
P1 O1 1.500(3) 2_655 ?
P1 O3 1.502(3) 1_565 ?
O1 P1 1.500(3) 2_645 ?
O3 P1 1.502(3) 1_545 ?
O4 C10 1.249(5) . ?
O5 C10 1.251(5) 3_655 ?
N1 C1 1.331(6) . ?
N1 C2 1.332(6) . ?
C1 C3 1.379(7) . ?
C2 C5 1.378(7) . ?
C3 C4 1.365(9) . ?
C4 C5 1.356(8) . ?
C10 O5 1.251(5) 3_655 ?
C10 C10 1.576(7) 3_655 ?
 
loop_
 _geom_angle_atom_site_label_1
 _geom_angle_atom_site_label_2
 _geom_angle_atom_site_label_3
 _geom_angle
 _geom_angle_site_symmetry_1
 _geom_angle_site_symmetry_3
 _geom_angle_publ_flag
O1 In1 O2 94.97(12) . . ?
O1 In1 O3 92.87(12) . . ?
O2 In1 O3 170.17(11) . . ?
O1 In1 O4 97.63(11) . . ?
O2 In1 O4 92.60(11) . . ?
O3 In1 O4 92.22(10) . . ?
O1 In1 O5 172.99(10) . . ?
O2 In1 O5 87.16(12) . . ?
O3 In1 O5 85.76(11) . . ?
O4 In1 O5 75.58(10) . . ?
O1 In1 N1 96.91(12) . . ?
O2 In1 N1 85.66(12) . . ?
O3 In1 N1 87.53(11) . . ?
O4 In1 N1 165.46(11) . . ?
O5 In1 N1 89.90(11) . . ?
O2 P1 O1 115.11(18) . 2_655 ?
O2 P1 O3 109.92(18) . 1_565 ?
O1 P1 O3 114.10(18) 2_655 1_565 ?
P1 O1 In1 139.12(18) 2_645 . ?
P1 O2 In1 146.98(19) . . ?
P1 O3 In1 134.10(17) 1_545 . ?
C10 O4 In1 115.3(2) . . ?
C10 O5 In1 114.7(2) 3_655 . ?
C1 N1 C2 117.8(4) . . ?
C1 N1 In1 121.6(3) . . ?
C2 N1 In1 120.6(3) . . ?
N1 C1 C3 121.5(6) . . ?
N1 C2 C5 122.7(5) . . ?
C4 C3 C1 120.7(6) . . ?
C5 C4 C3 117.6(6) . . ?
C4 C5 C2 119.7(6) . . ?
O4 C10 O5 125.9(4) . 3_655 ?
O4 C10 C10 117.3(4) . 3_655 ?
O5 C10 C10 116.8(4) 3_655 3_655 ?
 
_diffrn_measured_fraction_theta_max    0.973
_diffrn_reflns_theta_full              27.99
_diffrn_measured_fraction_theta_full   0.973
_refine_diff_density_max    0.724
_refine_diff_density_min   -0.734
_refine_diff_density_rms    0.129

#####EOF#####
 
data_compoundIV
 
_audit_creation_method            SHELXL-97
_chemical_name_systematic
;
 ?
;
_chemical_name_common             Indiumphosphiteoxalate
_chemical_melting_point           ?
_chemical_formula_moiety          ?
_chemical_formula_sum
 'C12 H31 In2 N4 O20 P3'
_chemical_formula_weight          873.96
 
loop_
 _atom_type_symbol
 _atom_type_description
 _atom_type_scat_dispersion_real
 _atom_type_scat_dispersion_imag
 _atom_type_scat_source
 'C'  'C'   0.0033   0.0016
 'International Tables Vol C Tables 4.2.6.8 and 6.1.1.4'
 'H'  'H'   0.0000   0.0000
 'International Tables Vol C Tables 4.2.6.8 and 6.1.1.4'
 'N'  'N'   0.0061   0.0033
 'International Tables Vol C Tables 4.2.6.8 and 6.1.1.4'
 'O'  'O'   0.0106   0.0060
 'International Tables Vol C Tables 4.2.6.8 and 6.1.1.4'
 'P'  'P'   0.1023   0.0942
 'International Tables Vol C Tables 4.2.6.8 and 6.1.1.4'
 'In'  'In'  -0.7276   1.3100
 'International Tables Vol C Tables 4.2.6.8 and 6.1.1.4'
 
_symmetry_cell_setting            Triclinic
_symmetry_space_group_name_H-M    P-1
 
loop_
 _symmetry_equiv_pos_as_xyz
 'x, y, z'
 '-x, -y, -z'
 
_cell_length_a                    9.195(3)
_cell_length_b                    12.390(4)
_cell_length_c                    13.126(4)
_cell_angle_alpha                 76.559(5)
_cell_angle_beta                  78.326(5)
_cell_angle_gamma                 76.967(5)
_cell_volume                      1399.1(8)
_cell_formula_units_Z             2
_cell_measurement_temperature     293(2)
_cell_measurement_reflns_used     6423
_cell_measurement_theta_min       1.72
_cell_measurement_theta_max       28.06
 
_exptl_crystal_description        platelike
_exptl_crystal_colour             colorless
_exptl_crystal_size_max           0.20
_exptl_crystal_size_mid           0.12
_exptl_crystal_size_min           0.08
_exptl_crystal_density_meas       ?
_exptl_crystal_density_diffrn     2.074
_exptl_crystal_density_method     'not measured'
_exptl_crystal_F_000              868
_exptl_absorpt_coefficient_mu     1.912
_exptl_absorpt_correction_type    ‘Multi-scan’
_exptl_absorpt_correction_T_min   0.7010
_exptl_absorpt_correction_T_max   0.8621
_exptl_absorpt_process_details    ‘(SADABS;Sheldrick,1996)’
 
_exptl_special_details
;
 ?
;
 
_diffrn_ambient_temperature       293(2)
_diffrn_radiation_wavelength      0.71073
_diffrn_radiation_type            MoK\a
_diffrn_radiation_source          'fine-focus sealed tube'
_diffrn_radiation_monochromator   graphite
_diffrn_measurement_device_type   'BrukerSMARTCCDareadetector'
_diffrn_measurement_method        '\fand\wscans'
_diffrn_detector_area_resol_mean  ?
_diffrn_standards_number          ?
_diffrn_standards_interval_count  ?
_diffrn_standards_interval_time   ?
_diffrn_standards_decay_%         ?
_diffrn_reflns_number             15648
_diffrn_reflns_av_R_equivalents   0.0207
_diffrn_reflns_av_sigmaI/netI     0.0288
_diffrn_reflns_limit_h_min        -12
_diffrn_reflns_limit_h_max        12
_diffrn_reflns_limit_k_min        -16
_diffrn_reflns_limit_k_max        16
_diffrn_reflns_limit_l_min        -17
_diffrn_reflns_limit_l_max        17
_diffrn_reflns_theta_min          1.72
_diffrn_reflns_theta_max          28.06
_reflns_number_total              6423
_reflns_number_gt                 5736
_reflns_threshold_expression      >2sigma(I)
 
_computing_data_collection        ‘SMART(Bruker,2000)’
_computing_cell_refinement        ‘SMART’
_computing_data_reduction         ‘SAINT(Bruker,2000)’
_computing_structure_solution     ‘SIR92(Altomareetal.,1993)’
_computing_structure_refinement   'SHELXL-97 (Sheldrick, 1997)'
_computing_molecular_graphics     ‘Ortep3forWindows(Farrugia,1997)andCAMERON
_computing_publication_material   ‘PLATON(Spek,1990)’
 
_refine_special_details
;
 Refinement of F^2^ against ALL reflections.  The weighted R-factor wR and
 goodness of fit S are based on F^2^, conventional R-factors R are based
 on F, with F set to zero for negative F^2^. The threshold expression of
 F^2^ > 2sigma(F^2^) is used only for calculating R-factors(gt) etc. and is
 not relevant to the choice of reflections for refinement.  R-factors based
 on F^2^ are statistically about twice as large as those based on F, and R-
 factors based on ALL data will be even larger.
;
 
_refine_ls_structure_factor_coef  Fsqd
_refine_ls_matrix_type            full
_refine_ls_weighting_scheme       calc
_refine_ls_weighting_details
 'calc w=1/[\s^2^(Fo^2^)+(0.0377P)^2^+9.4140P] where P=(Fo^2^+2Fc^2^)/3'
_atom_sites_solution_primary      direct
_atom_sites_solution_secondary    difmap
_atom_sites_solution_hydrogens    geom
_refine_ls_hydrogen_treatment     mixed
_refine_ls_extinction_method      none
_refine_ls_extinction_coef        ?
_refine_ls_number_reflns          6423
_refine_ls_number_parameters      386
_refine_ls_number_restraints      4
_refine_ls_R_factor_all           0.0402
_refine_ls_R_factor_gt            0.0343
_refine_ls_wR_factor_ref          0.1044
_refine_ls_wR_factor_gt           0.1005
_refine_ls_goodness_of_fit_ref    1.095
_refine_ls_restrained_S_all       1.095
_refine_ls_shift/su_max           0.001
_refine_ls_shift/su_mean          0.000
 
loop_
 _atom_site_label
 _atom_site_type_symbol
 _atom_site_fract_x
 _atom_site_fract_y
 _atom_site_fract_z
 _atom_site_U_iso_or_equiv
 _atom_site_adp_type
 _atom_site_occupancy
 _atom_site_symmetry_multiplicity
 _atom_site_calc_flag
 _atom_site_refinement_flags
 _atom_site_disorder_assembly
 _atom_site_disorder_group
H201 H 0.333(19) 0.532(13) 0.208(5) 0.18(8) Uiso 1 1 d D . .
H202 H 0.258(10) 0.534(9) 0.112(8) 0.09(4) Uiso 1 1 d D . .
H301 H 0.193(11) 0.382(6) 0.387(7) 0.10(4) Uiso 1 1 d D . .
H302 H 0.238(11) 0.477(7) 0.390(6) 0.08(3) Uiso 1 1 d D . .
In1 In 0.20143(3) 0.10271(3) -0.00185(2) 0.01451(9) Uani 1 1 d . . .
In2 In 0.18364(3) -0.09731(3) 0.35809(2) 0.01522(9) Uani 1 1 d . . .
P1 P 0.45569(12) -0.06789(10) 0.14521(9) 0.0156(2) Uani 1 1 d . . .
H1 H 0.4441 -0.1220 0.1050 0.019 Uiso 1 1 calc R . .
P2 P -0.08700(12) 0.13149(10) -0.13271(9) 0.0150(2) Uani 1 1 d . . .
H2 H -0.1565 0.2042 -0.1448 0.018 Uiso 1 1 calc R . .
P3 P 0.11055(14) 0.14479(11) 0.44575(10) 0.0193(2) Uani 1 1 d . . .
H3 H 0.0308 0.1946 0.4083 0.023 Uiso 1 1 calc R . .
O1 O 0.1531(4) -0.0619(3) 0.0289(2) 0.0193(7) Uani 1 1 d . . .
O2 O 0.3688(4) 0.0461(3) 0.1005(3) 0.0223(7) Uani 1 1 d . . .
O3 O 0.3743(4) 0.0677(3) -0.1329(3) 0.0211(7) Uani 1 1 d . . .
O4 O 0.0182(4) 0.1734(3) 0.1075(3) 0.0261(8) Uani 1 1 d . . .
O5 O 0.0666(4) 0.1563(3) -0.1270(3) 0.0229(7) Uani 1 1 d . . .
O6 O 0.2411(4) 0.2706(3) -0.0159(3) 0.0268(8) Uani 1 1 d . . .
O7 O 0.1995(4) 0.0633(3) 0.3745(3) 0.0285(8) Uani 1 1 d . . .
O8 O 0.0744(4) -0.0772(3) 0.2275(3) 0.0237(7) Uani 1 1 d . . .
O9 O -0.0341(4) -0.0869(3) 0.4488(3) 0.0285(8) Uani 1 1 d . . .
O10 O 0.3990(4) -0.1108(3) 0.2616(3) 0.0255(8) Uani 1 1 d . . .
O11 O 0.3054(4) -0.1743(3) 0.4920(3) 0.0235(7) Uani 1 1 d . . .
O12 O 0.1942(5) -0.2818(3) 0.3802(3) 0.0292(8) Uani 1 1 d . . .
O13 O 0.2116(4) 0.2186(4) 0.4621(3) 0.0354(10) Uani 1 1 d . . .
O14 O 0.1746(6) 0.4160(4) 0.0662(5) 0.0580(14) Uani 1 1 d . . .
O15 O -0.0607(6) 0.3174(4) 0.1911(4) 0.0528(13) Uani 1 1 d . . .
O16 O 0.3721(5) -0.3362(3) 0.6025(3) 0.0321(9) Uani 1 1 d . . .
O17 O 0.2395(6) -0.4418(4) 0.4978(4) 0.0475(12) Uani 1 1 d . . .
C1 C 0.2424(6) -0.3412(4) 0.4632(4) 0.0231(10) Uani 1 1 d . . .
C2 C 0.3122(5) -0.2793(4) 0.5260(4) 0.0219(10) Uani 1 1 d . . .
C3 C 0.1580(6) 0.3253(5) 0.0540(5) 0.0298(11) Uani 1 1 d . . .
C4 C 0.0268(6) 0.2696(5) 0.1254(4) 0.0286(11) Uani 1 1 d . . .
C10 C 0.4860(5) 0.1942(4) 0.3306(4) 0.0199(9) Uani 1 1 d . . .
H10A H 0.3851 0.1952 0.3711 0.024 Uiso 1 1 calc R . .
H10B H 0.5312 0.2474 0.3519 0.024 Uiso 1 1 calc R . .
C11 C 0.4759(6) 0.2293(5) 0.2164(5) 0.0334(12) Uani 1 1 d . . .
H11A H 0.4164 0.3050 0.2025 0.040 Uiso 1 1 calc R . .
H11B H 0.4260 0.1786 0.1956 0.040 Uiso 1 1 calc R . .
C12 C 0.7328(5) 0.1147(4) 0.1789(4) 0.0180(9) Uani 1 1 d . . .
H12A H 0.6970 0.0587 0.1545 0.022 Uiso 1 1 calc R . .
H12B H 0.8347 0.1185 0.1419 0.022 Uiso 1 1 calc R . .
C13 C 0.7361(6) 0.0786(5) 0.2945(4) 0.0295(11) Uani 1 1 d . . .
H13A H 0.7827 0.1295 0.3179 0.035 Uiso 1 1 calc R . .
H13B H 0.7961 0.0033 0.3090 0.035 Uiso 1 1 calc R . .
C14 C 0.6278(7) 0.6416(5) 0.2843(5) 0.0360(13) Uani 1 1 d . . .
H14A H 0.5280 0.6225 0.3058 0.043 Uiso 1 1 calc R . .
H14B H 0.6302 0.6911 0.2151 0.043 Uiso 1 1 calc R . .
C15 C 0.7413(6) 0.5378(4) 0.2767(4) 0.0234(10) Uani 1 1 d . . .
H15A H 0.7222 0.5022 0.2235 0.028 Uiso 1 1 calc R . .
H15B H 0.7327 0.4854 0.3442 0.028 Uiso 1 1 calc R . .
C16 C 0.8135(5) 0.7264(4) 0.3365(4) 0.0180(9) Uani 1 1 d . . .
H16A H 0.8230 0.7803 0.2699 0.022 Uiso 1 1 calc R . .
H16B H 0.8322 0.7602 0.3912 0.022 Uiso 1 1 calc R . .
C17 C 0.9285(6) 0.6221(5) 0.3271(4) 0.0290(11) Uani 1 1 d . . .
H17A H 0.9276 0.5717 0.3959 0.035 Uiso 1 1 calc R . .
H17B H 1.0282 0.6415 0.3047 0.035 Uiso 1 1 calc R . .
N1 N 0.6569(6) 0.7027(5) 0.3633(5) 0.0477(14) Uani 1 1 d . . .
H1A H 0.5900 0.7681 0.3629 0.057 Uiso 1 1 calc R . .
H1B H 0.6440 0.6601 0.4289 0.057 Uiso 1 1 calc R . .
N2 N 0.8970(6) 0.5627(5) 0.2480(5) 0.0443(13) Uani 1 1 d . . .
H2A H 0.9075 0.6065 0.1829 0.053 Uiso 1 1 calc R . .
H2B H 0.9645 0.4977 0.2464 0.053 Uiso 1 1 calc R . .
N3 N 0.6330(7) 0.2272(5) 0.1521(5) 0.0504(15) Uani 1 1 d . . .
H3A H 0.6265 0.2426 0.0826 0.060 Uiso 1 1 calc R . .
H3B H 0.6741 0.2810 0.1652 0.060 Uiso 1 1 calc R . .
N4 N 0.5780(6) 0.0792(5) 0.3544(4) 0.0419(13) Uani 1 1 d . . .
H4A H 0.5362 0.0294 0.3353 0.050 Uiso 1 1 calc R . .
H4B H 0.5807 0.0585 0.4245 0.050 Uiso 1 1 calc R . .
O100 O 0.6252(6) 0.4949(5) 0.1142(4) 0.0564(13) Uani 1 1 d . . .
O200 O 0.3107(9) 0.5572(6) 0.1459(7) 0.0752(18) Uani 1 1 d D . .
O300 O 0.2307(9) 0.4369(5) 0.3477(5) 0.0676(17) Uani 1 1 d D . .
 
loop_
 _atom_site_aniso_label
 _atom_site_aniso_U_11
 _atom_site_aniso_U_22
 _atom_site_aniso_U_33
 _atom_site_aniso_U_23
 _atom_site_aniso_U_13
 _atom_site_aniso_U_12
In1 0.01296(15) 0.01777(17) 0.01246(15) -0.00239(11) -0.00083(11) -0.00384(11)
In2 0.01557(16) 0.01963(18) 0.01066(15) -0.00272(12) 0.00035(11) -0.00616(12)
P1 0.0123(5) 0.0218(6) 0.0132(5) -0.0040(4) 0.0001(4) -0.0053(4)
P2 0.0134(5) 0.0175(6) 0.0134(5) -0.0001(4) -0.0030(4) -0.0040(4)
P3 0.0178(6) 0.0221(6) 0.0179(6) -0.0057(5) 0.0019(4) -0.0059(5)
O1 0.0212(16) 0.0247(18) 0.0133(15) -0.0038(13) 0.0010(12) -0.0106(13)
O2 0.0226(17) 0.0274(19) 0.0184(16) -0.0029(14) -0.0081(13) -0.0049(14)
O3 0.0129(15) 0.033(2) 0.0180(16) -0.0074(14) 0.0008(12) -0.0063(13)
O4 0.0222(17) 0.028(2) 0.0270(18) -0.0111(15) 0.0073(14) -0.0064(15)
O5 0.0201(16) 0.034(2) 0.0167(16) 0.0032(14) -0.0051(13) -0.0148(15)
O6 0.0294(19) 0.0226(19) 0.0285(19) -0.0031(15) -0.0002(15) -0.0109(15)
O7 0.033(2) 0.032(2) 0.0236(18) -0.0143(16) 0.0129(15) -0.0176(16)
O8 0.0266(18) 0.031(2) 0.0148(16) -0.0047(14) -0.0061(13) -0.0050(15)
O9 0.0207(18) 0.041(2) 0.0204(18) -0.0056(16) 0.0069(14) -0.0077(16)
O10 0.0162(16) 0.034(2) 0.0173(17) 0.0027(15) 0.0035(13) 0.0002(14)
O11 0.0314(19) 0.0225(19) 0.0195(17) -0.0006(14) -0.0088(14) -0.0103(15)
O12 0.042(2) 0.025(2) 0.0257(19) -0.0049(15) -0.0127(16) -0.0115(17)
O13 0.033(2) 0.039(2) 0.041(2) -0.0235(19) 0.0110(17) -0.0195(18)
O14 0.070(3) 0.039(3) 0.076(4) -0.031(3) 0.006(3) -0.027(3)
O15 0.054(3) 0.050(3) 0.056(3) -0.035(3) 0.017(2) -0.010(2)
O16 0.044(2) 0.026(2) 0.027(2) 0.0038(16) -0.0174(17) -0.0084(17)
O17 0.088(4) 0.023(2) 0.040(2) 0.0050(18) -0.029(2) -0.021(2)
C1 0.033(3) 0.019(2) 0.019(2) -0.0028(19) -0.0046(19) -0.007(2)
C2 0.020(2) 0.029(3) 0.016(2) -0.0045(19) 0.0002(17) -0.0079(19)
C3 0.031(3) 0.029(3) 0.032(3) -0.008(2) -0.008(2) -0.008(2)
C4 0.032(3) 0.025(3) 0.030(3) -0.010(2) -0.004(2) -0.004(2)
C10 0.012(2) 0.028(3) 0.023(2) -0.016(2) 0.0054(17) -0.0066(18)
C11 0.029(3) 0.034(3) 0.038(3) -0.012(3) -0.011(2) 0.001(2)
C12 0.017(2) 0.020(2) 0.017(2) -0.0106(18) 0.0063(16) -0.0050(17)
C13 0.024(3) 0.037(3) 0.029(3) -0.012(2) -0.004(2) -0.005(2)
C14 0.028(3) 0.043(4) 0.035(3) 0.001(3) -0.008(2) -0.009(2)
C15 0.030(3) 0.020(2) 0.024(2) -0.0004(19) -0.008(2) -0.013(2)
C16 0.028(2) 0.010(2) 0.016(2) -0.0028(16) -0.0010(17) -0.0042(17)
C17 0.025(3) 0.032(3) 0.030(3) -0.005(2) -0.004(2) -0.007(2)
N1 0.044(3) 0.051(4) 0.038(3) -0.004(3) -0.002(2) 0.002(3)
N2 0.045(3) 0.041(3) 0.049(3) -0.016(3) -0.005(3) -0.006(2)
N3 0.063(4) 0.051(4) 0.036(3) -0.008(3) -0.001(3) -0.015(3)
N4 0.045(3) 0.049(3) 0.037(3) -0.013(2) 0.001(2) -0.019(3)
O100 0.071(4) 0.053(3) 0.056(3) -0.010(3) -0.019(3) -0.024(3)
O200 0.081(5) 0.076(5) 0.083(5) -0.038(4) -0.021(4) -0.014(4)
O300 0.109(5) 0.044(3) 0.058(4) -0.013(3) -0.024(4) -0.018(3)
 
_geom_special_details
;
 All esds (except the esd in the dihedral angle between two l.s. planes)
 are estimated using the full covariance matrix.  The cell esds are taken
 into account individually in the estimation of esds in distances, angles
 and torsion angles; correlations between esds in cell parameters are only
 used when they are defined by crystal symmetry.  An approximate (isotropic)
 treatment of cell esds is used for estimating esds involving l.s. planes.
;
 
loop_
 _geom_bond_atom_site_label_1
 _geom_bond_atom_site_label_2
 _geom_bond_distance
 _geom_bond_site_symmetry_2
 _geom_bond_publ_flag
In1 O1 2.115(3) . ?
In1 O2 2.139(3) . ?
In1 O3 2.145(3) . ?
In1 O4 2.146(3) . ?
In1 O5 2.150(3) . ?
In1 O6 2.152(4) . ?
In2 O7 2.091(4) . ?
In2 O8 2.097(3) . ?
In2 O9 2.105(3) . ?
In2 O10 2.118(3) . ?
In2 O11 2.188(3) . ?
In2 O12 2.219(4) . ?
P1 O2 1.508(4) . ?
P1 O10 1.521(3) . ?
P1 O3 1.539(3) 2_655 ?
P2 O8 1.519(3) 2 ?
P2 O1 1.524(3) 2 ?
P2 O5 1.531(3) . ?
P3 O9 1.516(4) 2_556 ?
P3 O13 1.517(4) . ?
P3 O7 1.523(4) . ?
O1 P2 1.524(3) 2 ?
O3 P1 1.539(3) 2_655 ?
O4 C4 1.290(6) . ?
O6 C3 1.287(7) . ?
O8 P2 1.519(3) 2 ?
O9 P3 1.516(4) 2_556 ?
O11 C2 1.265(6) . ?
O12 C1 1.265(6) . ?
O14 C3 1.218(7) . ?
O15 C4 1.217(7) . ?
O16 C2 1.236(6) . ?
O17 C1 1.228(6) . ?
C1 C2 1.553(7) . ?
C3 C4 1.558(8) . ?
C10 C11 1.477(7) . ?
C10 N4 1.484(8) . ?
C11 N3 1.516(8) . ?
C12 C13 1.483(7) . ?
C12 N3 1.494(8) . ?
C13 N4 1.505(7) . ?
C14 C15 1.471(8) . ?
C14 N1 1.513(8) . ?
C15 N2 1.488(7) . ?
C16 C17 1.486(7) . ?
C16 N1 1.490(7) . ?
C17 N2 1.510(7) . ?
 
loop_
 _geom_angle_atom_site_label_1
 _geom_angle_atom_site_label_2
 _geom_angle_atom_site_label_3
 _geom_angle
 _geom_angle_site_symmetry_1
 _geom_angle_site_symmetry_3
 _geom_angle_publ_flag
O1 In1 O2 90.58(13) . . ?
O1 In1 O3 91.84(13) . . ?
O2 In1 O3 89.00(13) . . ?
O1 In1 O4 98.03(13) . . ?
O2 In1 O4 98.53(14) . . ?
O3 In1 O4 167.48(14) . . ?
O1 In1 O5 90.95(13) . . ?
O2 In1 O5 169.84(13) . . ?
O3 In1 O5 80.91(13) . . ?
O4 In1 O5 91.21(14) . . ?
O1 In1 O6 173.96(13) . . ?
O2 In1 O6 87.00(14) . . ?
O3 In1 O6 93.65(13) . . ?
O4 In1 O6 76.88(14) . . ?
O5 In1 O6 92.41(14) . . ?
O7 In2 O8 107.76(15) . . ?
O7 In2 O9 92.20(14) . . ?
O8 In2 O9 85.70(14) . . ?
O7 In2 O10 89.72(14) . . ?
O8 In2 O10 91.88(14) . . ?
O9 In2 O10 177.28(15) . . ?
O7 In2 O11 90.24(15) . . ?
O8 In2 O11 161.90(14) . . ?
O9 In2 O11 95.75(14) . . ?
O10 In2 O11 86.16(14) . . ?
O7 In2 O12 164.58(15) . . ?
O8 In2 O12 87.63(14) . . ?
O9 In2 O12 87.87(15) . . ?
O10 In2 O12 90.79(15) . . ?
O11 In2 O12 74.42(13) . . ?
O2 P1 O10 113.4(2) . . ?
O2 P1 O3 111.9(2) . 2_655 ?
O10 P1 O3 108.2(2) . 2_655 ?
O8 P2 O1 112.7(2) 2 2 ?
O8 P2 O5 110.0(2) 2 . ?
O1 P2 O5 112.05(19) 2 . ?
O9 P3 O13 110.9(2) 2_556 . ?
O9 P3 O7 113.6(2) 2_556 . ?
O13 P3 O7 110.1(2) . . ?
P2 O1 In1 129.38(19) 2 . ?
P1 O2 In1 134.4(2) . . ?
P1 O3 In1 127.94(19) 2_655 . ?
C4 O4 In1 115.6(3) . . ?
P2 O5 In1 130.51(19) . . ?
C3 O6 In1 115.0(3) . . ?
P3 O7 In2 134.5(2) . . ?
P2 O8 In2 139.3(2) 2 . ?
P3 O9 In2 138.2(2) 2_556 . ?
P1 O10 In2 134.4(2) . . ?
C2 O11 In2 116.8(3) . . ?
C1 O12 In2 115.7(3) . . ?
O17 C1 O12 126.4(5) . . ?
O17 C1 C2 117.8(5) . . ?
O12 C1 C2 115.8(4) . . ?
O16 C2 O11 125.8(5) . . ?
O16 C2 C1 117.9(5) . . ?
O11 C2 C1 116.2(4) . . ?
O14 C3 O6 124.6(5) . . ?
O14 C3 C4 119.3(5) . . ?
O6 C3 C4 116.1(4) . . ?
O15 C4 O4 124.3(5) . . ?
O15 C4 C3 120.5(5) . . ?
O4 C4 C3 115.2(4) . . ?
C11 C10 N4 111.1(4) . . ?
C10 C11 N3 109.9(5) . . ?
C13 C12 N3 112.2(4) . . ?
C12 C13 N4 110.2(4) . . ?
C15 C14 N1 111.4(5) . . ?
C14 C15 N2 111.2(4) . . ?
C17 C16 N1 111.8(4) . . ?
C16 C17 N2 110.9(4) . . ?
C16 N1 C14 110.8(5) . . ?
C15 N2 C17 110.8(5) . . ?
C12 N3 C11 111.3(5) . . ?
C10 N4 C13 109.4(4) . . ?
 
_diffrn_measured_fraction_theta_max    0.944
_diffrn_reflns_theta_full              28.06
_diffrn_measured_fraction_theta_full   0.944
_refine_diff_density_max    1.073
_refine_diff_density_min   -0.949
_refine_diff_density_rms    0.173

#####EOF#######
